# Supplementary material for: DNA and BSA Interaction Studies and Antileukemic Evaluation of Polyaromatic Thiosemicarbazones and Their Copper Complexes
Source: MDPI journal article supplement (doi:10.3390/compounds2020011), 2022-05-23

# DNA and BSA Interaction Studies and Antileukemic Evaluation of Polyaromatic Thiosemicarbazones and Their Copper Complexes

Giorgio Pelosi <sup>1,2,3</sup>, Silvana Pinelli <sup>4</sup> and Franco Bisceglie <sup>1,2,3,\*</sup>

<sup>1</sup> Department of Chemistry, Life Sciences and Environmental Sustainability, University of Parma, 43124 Parma, Italy;

<sup>2</sup> C.E.R.T. Centro di Eccellenza per la Ricerca Tossicologica, University of Parma, 43124 Parma, Italy

<sup>3</sup> C.O.M.T. Centre for Molecular and Translational Oncology, University of Parma, 43124 Parma, Italy

<sup>4</sup> Department of Medicine and Surgery, University of Parma, 43126 Parma, Italy

\* Correspondence: franco.bisceglie@unipr.it

## Supplementary Informations

L<sub>1</sub> (CCDC 2164725)

**Crystal data:** C<sub>14</sub>H<sub>15</sub>N<sub>3</sub>S<sub>1</sub>, Mr = 257.35, orthorhombic, space group Pcab, a = 7.5832(3), b = 12.3944(5), c = 28.4373(11) Å, V = 2672.8(2) Å<sup>3</sup>, Z = 8, ρ<sub>calc</sub> = 1.279 Mg·m<sup>-3</sup>, T = 293.15 K, F(000) = 1088, crystal dimensions = 0.20 × 0.20 × 0.20 mm, indexes range = −9 < h < 9, −15 < k < 15, −35 < l < 35, collected reflections = 30191, unique reflections = 2736, refined parameters = 223, goodness-of-fit = 1.058, R factor = 0.0350, wR2 = 0.0941, residual electron density = 0.21 and −0.16 eÅ<sup>-3</sup>.

L<sub>3</sub> (CCDC 2164721)

**Crystal data:** C<sub>18</sub>H<sub>16</sub>Cl<sub>1</sub>N<sub>3</sub>S<sub>1</sub>, Mr = 341.85, orthorhombic, space group Pca2<sub>1</sub>, a = 7.9863(8), b = 9.7195(9), c = 21.2622(19) Å, V = 1650.4(3) Å<sup>3</sup>, Z = 4, ρ<sub>calc</sub> = 1.376 Mg·m<sup>-3</sup>, T = 296.15 K, F(000) = 712, crystal dimensions = 0.10 × 0.10 × 0.10 mm, index range = −9 < h < 10, −12 < k < 12, −26 < l < 26, collected reflections = 19173, unique reflections = 1924, refined parameters = 210, goodness-of-fit = 1.012, R factor = 0.0497, wR2 = 0.1054, residual electron density = 0.23 and −0.26 eÅ<sup>-3</sup>.

L<sub>4</sub> (CCDC 2164724)

**Crystal data:** C<sub>17</sub>H<sub>14</sub>Cl<sub>1</sub>N<sub>3</sub>S<sub>1</sub>, Mr = 327.82, monoclinic, space group P2<sub>1</sub>/c, a = 10.9230(7), b = 8.8750(4), c = 15.8800(16) Å, β = 94.226(9)°, V = 1535.2(7) Å<sup>3</sup>, Z = 4, ρ<sub>calc</sub> = 1.418 Mg·m<sup>-3</sup>, T = 293.15 K, F(000) = 680, crystal dimensions = 0.20 × 0.20 × 0.20 mm, index range = −13 < h < 13, −3 < k < 10, −4 < l < 19, collected reflections = 3007, unique reflections = 2905, refined parameters = 207, goodness-of-fit = 0.887, R factor = 0.0520, wR2 = 0.0975, residual electron density = 0.22 and −0.22 eÅ<sup>-3</sup>.

[Cu<sup>I</sup>(L<sub>1</sub>)<sub>2</sub>](HSO<sub>4</sub>) (1) (CCDC 2164723)

**Crystal data:** C<sub>28</sub>H<sub>31</sub>Cu<sub>1</sub>N<sub>6</sub>O<sub>4</sub>S<sub>3</sub>, Mr = 675.31, triclinic, space group P-1, a = 11.6646(5), b = 14.9211(7), c = 9.0074(8) Å, α = 90.609(7), β = 95.373(4), γ = 74.663(5)°, V = 1505.1(2) Å<sup>3</sup>, Z = 2, ρ<sub>calc</sub> = 1.490 Mg·m<sup>-3</sup>, T = 293.15 K, F(000) = 700, crystal dimensions = 0.10 × 0.10 × 0.10 mm, index range −14 < h < 14, −18 < k < 18, −1 < l < 10, collected reflections = 5669, unique reflections = 5667, refined parameters = 381, goodness-of-fit = 1.048, R factor = 0.0551, wR2 = 0.1486, residual electron density = 1.10 and −0.68 eÅ<sup>-3</sup>.

L<sub>5</sub> (CCDC 2164722)

**Crystal data:** C<sub>13</sub>H<sub>13</sub>N<sub>3</sub>S<sub>1</sub>, Mr = 243.32, triclinic, space group P-1, a = 5.8381(7), b = 8.7678(11), c = 12.8504(16) Å, α = 72.4065(19), β = 86.5610(19), γ = 81.701(2)°, V = 620.35(13) Å<sup>3</sup>, Z = 2, ρ<sub>calc</sub> = 1.303 Mg·m<sup>-3</sup>, T = 293.15 K, F(000) = 256, crystal dimensions = 0.10 × 0.10 × 0.10 mm, index range = −8 < h < 8, −12 < k < 12, −18 < l < 18, collected reflections = 10130, unique reflections = 3906, refined parameters = 206, goodness-of-fit = 1.075, R factor = 0.0418, wR2 = 0.1251, residual electron density = 0.26 and −0.14 eÅ<sup>-3</sup>.

[Cu<sup>I</sup><sub>2</sub>(SO<sub>4</sub>)(L<sub>2</sub>)<sub>5</sub>] (2). (CCDC 2164726)

**Crystal data:** C<sub>65</sub>H<sub>71</sub>Cu<sub>2</sub>N<sub>15</sub>O<sub>7</sub>S<sub>6</sub>, Mr = 1493.80, triclinic, space group P-1, a = 10.4703(11), b = 14.6148(15), c = 25.4741(26) Å, α = 96.778(2), β = 94.401(2), γ = 109.416(1)°, V = 3622.6(6) Å<sup>3</sup>, Z = 2, ρ<sub>calc</sub> = 1.369 Mg·m<sup>-3</sup>, T = 293.15 K, F(000) = 1552, crystal dimensions = 0.20 × 0.10 × 0.210 mm, index range −13 < h < 13, −18 < k < 18, −31 < l < 31, collected reflections = 43186, unique reflections = 14866, refined parameters = 829, goodness-of-fit = 1.065, R factor = 0.0603, wR2 = 0.1769, residual electron density = 0.58 and −0.35 eÅ<sup>-3</sup>.

In this structure, a solvent mask was calculated and 61 electrons were found in a volume of 410 Å<sup>3</sup> in 1 void per unit cell. This is consistent with the presence of 3[H<sub>2</sub>O] per Formula Unit which account for 60 electrons per unit cell.

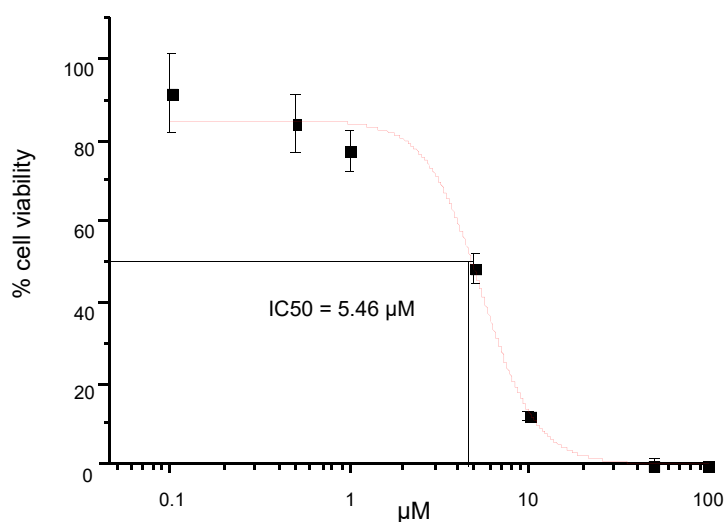

**Figure S1.** U937 cell viability curve after treatment with [Cu<sup>I</sup>(L<sub>1</sub>)<sub>2</sub>](HSO<sub>4</sub>) (1) at different concentrations.

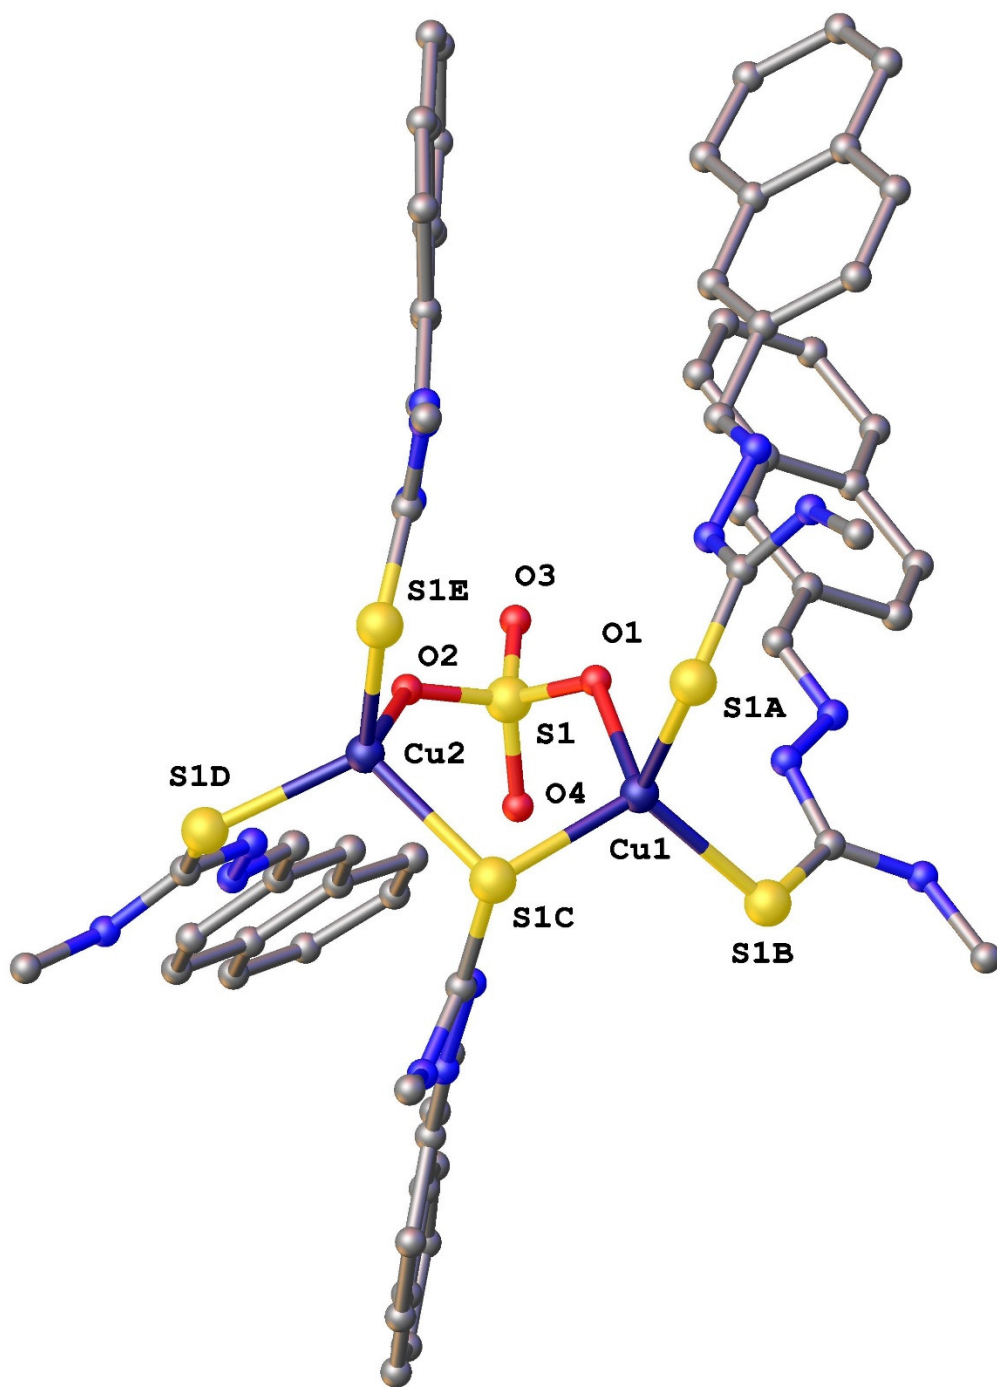

Supplement: s1 [file s1]
